# Supplementary material
Source: ML conference proceedings conference paper supplement (https://proceedings.neurips.cc/paper_files/paper/2016/hash/8c01a75941549a705cf7275e41b21f0d-Abstract.html)
Supplement: Supplementary file 1 [file 8c01a75941549a705cf7275e41b21f0d-Supplemental.zip]

Archive with 1 entries (1 files):
- supplementary.pdf
